# Supplementary material
Source: Springer Nature journal article supplement (https://www.springermedizin.de/resource/supplementary/13256_2014_3007_MOESM1_ESM.pdf/9651068)

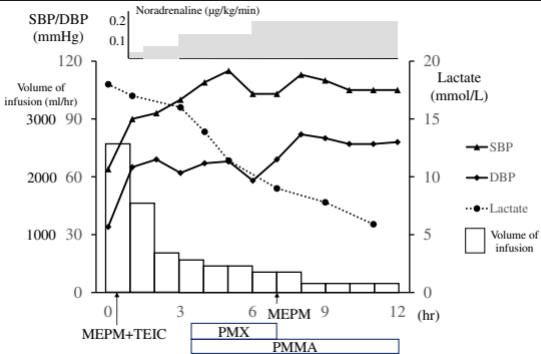

Supplement: MOESM1 [file 9651068]
